# Supplementary material for: Subvalent group 13 molecules by carbene-induced hydrogen abstraction
Source: Royal Society of Chemistry journal article supplement (doi:10.1039/d3dt00765k), 2023-01-01
Supplement: d3dt00765k1.pdf [file d3dt00765k1.pdf]

Electronic Supplementary Information for:

**Subvalent Group 13 Molecules by Carbene-induced Hydrogen  
Abstraction**

Luis Werner<sup>[a]</sup>, Andreas Hock<sup>[a]</sup>, Christian Luz<sup>[a]</sup>, Melanie Riethmann<sup>[a]</sup>, and Udo Radius<sup>[a]\*</sup>.

<sup>[a]</sup>Institut für Anorganische Chemie, Julius-Maximilians-Universität Würzburg, Am Hubland, 97074 Würzburg, Germany.

## NMR spectra of compounds

(Me<sub>2</sub>Im<sup>Me</sup>)-Cp\*AlH<sub>2</sub> 5

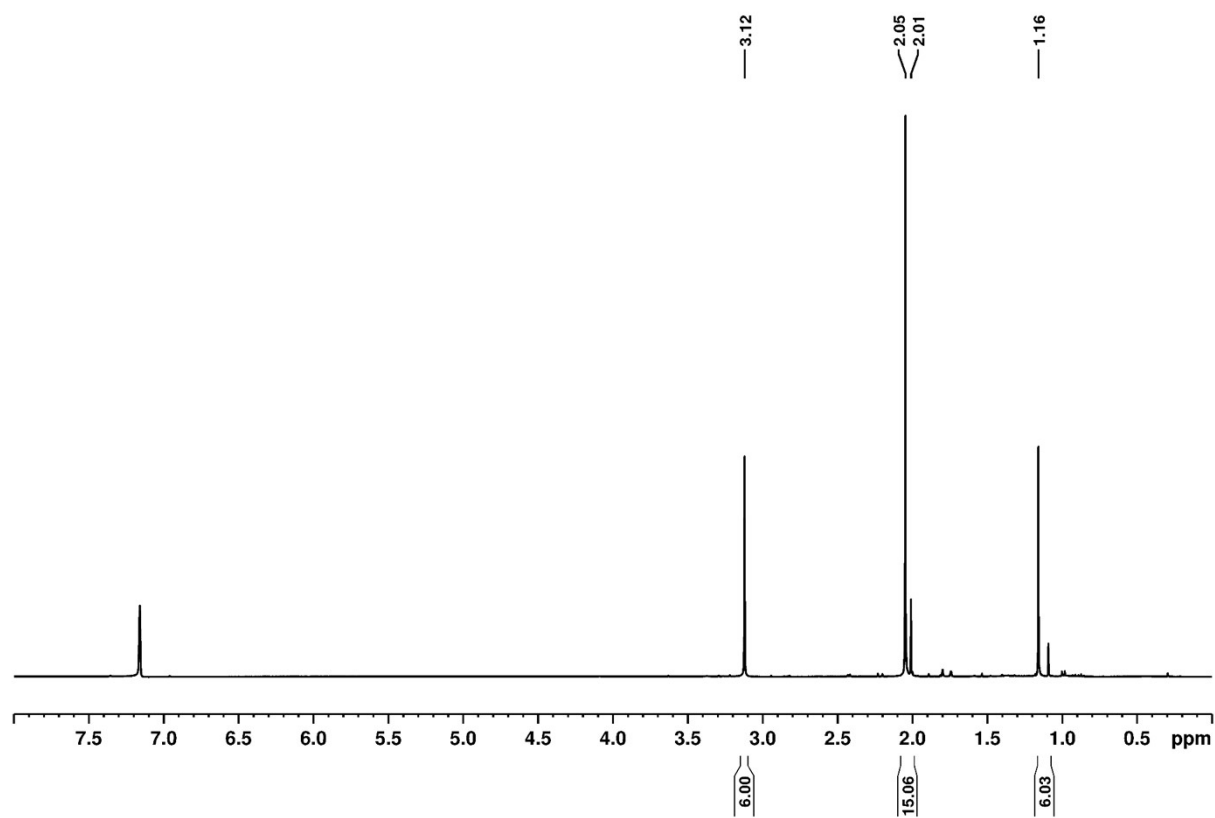

Figure S1. <sup>1</sup>H NMR spectrum (400.1 MHz, C<sub>6</sub>D<sub>6</sub>, 298 K) of (Me<sub>2</sub>Im<sup>Me</sup>)-Cp\*AlH<sub>2</sub> 5

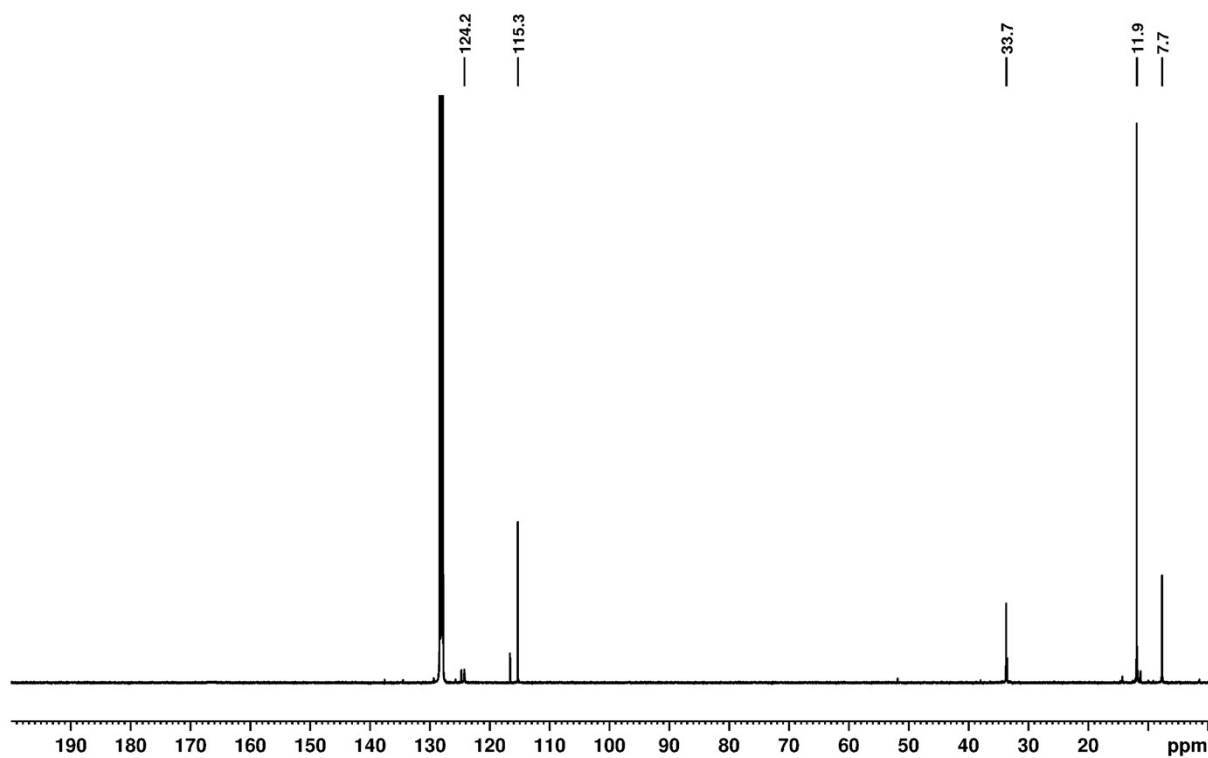

Figure S2. <sup>13</sup>C NMR spectrum (100.6 MHz, C<sub>6</sub>D<sub>6</sub>, 298 K) of (Me<sub>2</sub>Im<sup>Me</sup>)-Cp\*AlH<sub>2</sub> 5.

$(i\text{Pr}_2\text{Im}^{\text{Me}})\cdot\text{Cp}^*\text{AlH}_2$  **6**:

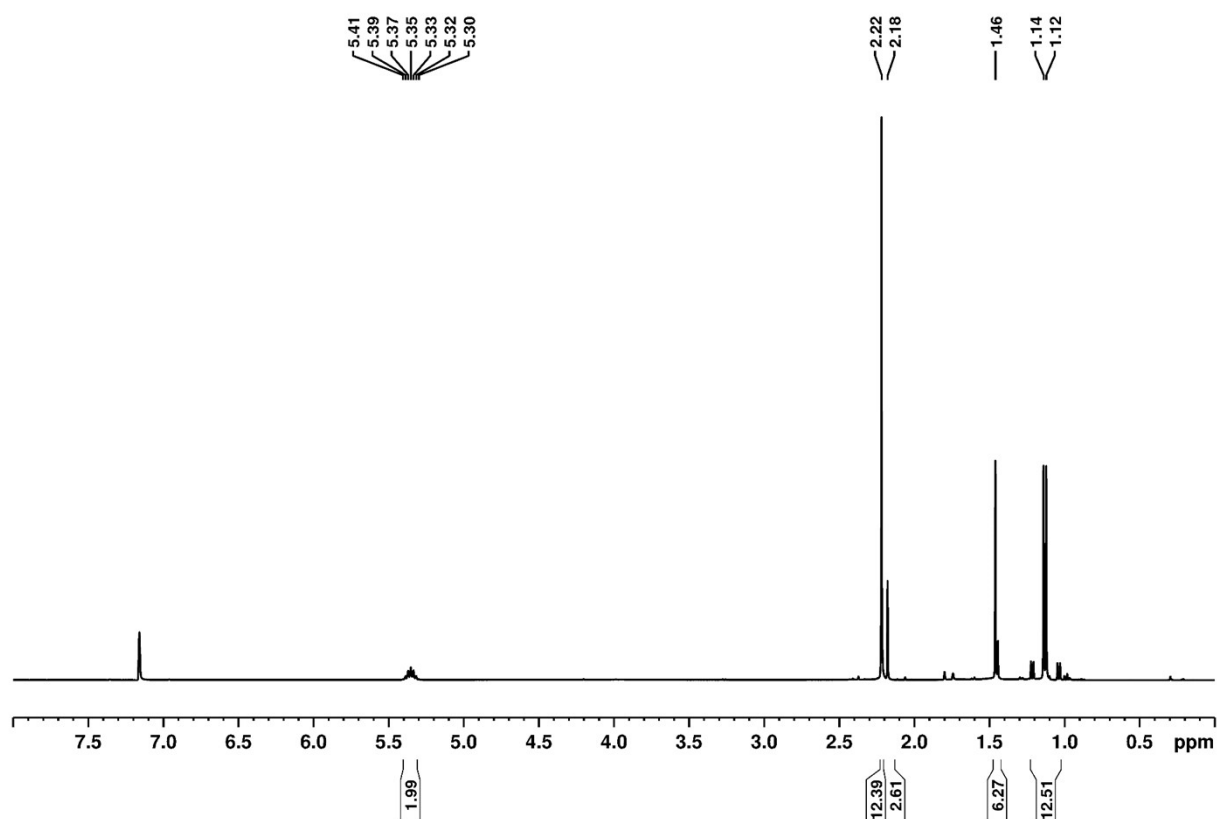

Figure S3.  $^1\text{H}$  NMR spectrum (400.1 MHz,  $\text{C}_6\text{D}_6$ , 298 K) of  $(i\text{Pr}_2\text{Im}^{\text{Me}})\cdot\text{Cp}^*\text{AlH}_2$  **6**.

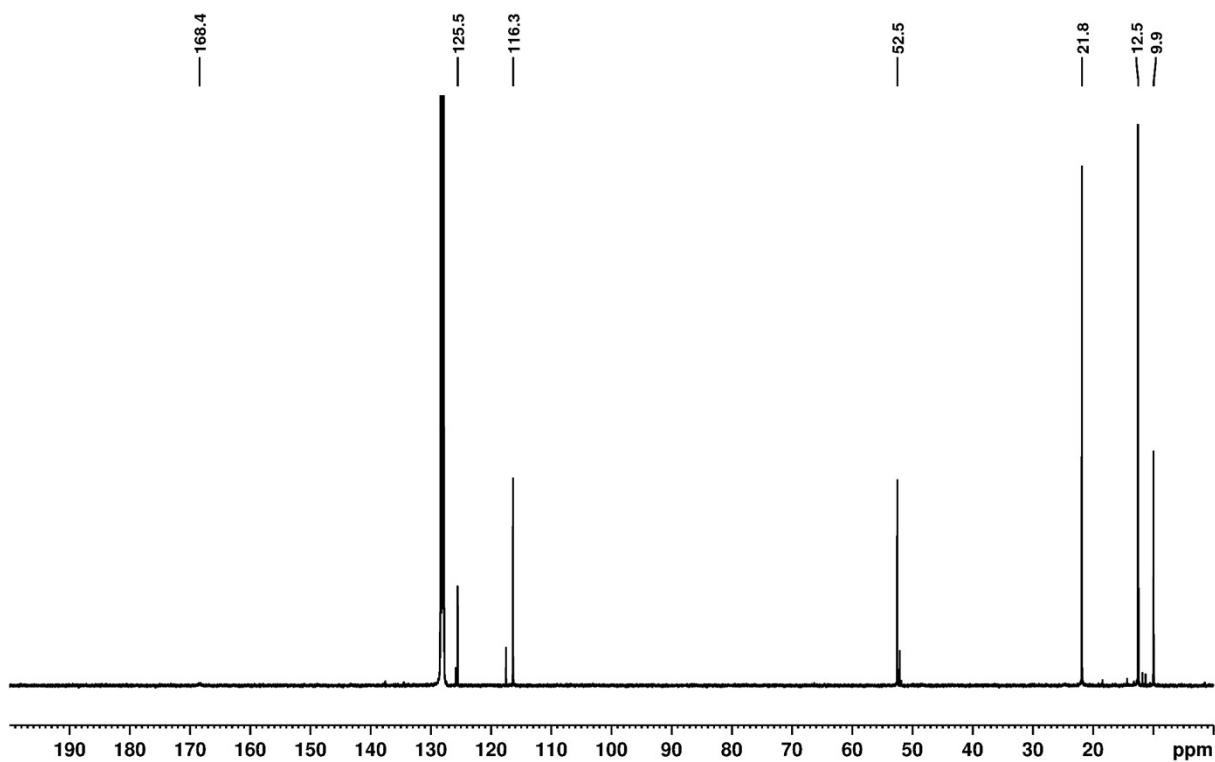

Figure S4.  $^{13}\text{C}$  NMR spectrum (100.6 MHz,  $\text{C}_6\text{D}_6$ , 298 K) of  $(i\text{Pr}_2\text{Im}^{\text{Me}})\cdot\text{Cp}^*\text{AlH}_2$  **6**.

(Dipp<sub>2</sub>Im)·Cp\*AlH<sub>2</sub> 7:

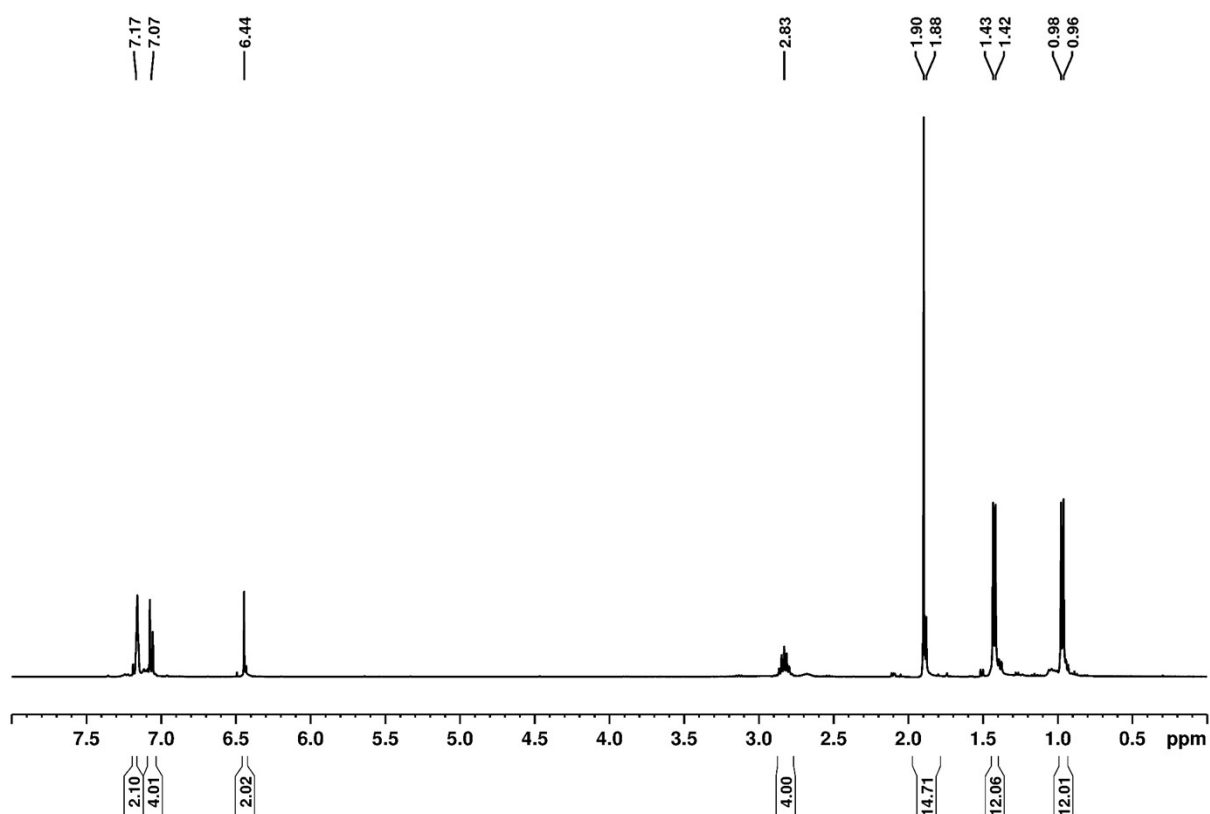

Figure S5. <sup>1</sup>H NMR spectrum (400.1 MHz, C<sub>6</sub>D<sub>6</sub>, 298 K) of (Dipp<sub>2</sub>Im)·Cp\*AlH<sub>2</sub> 7.

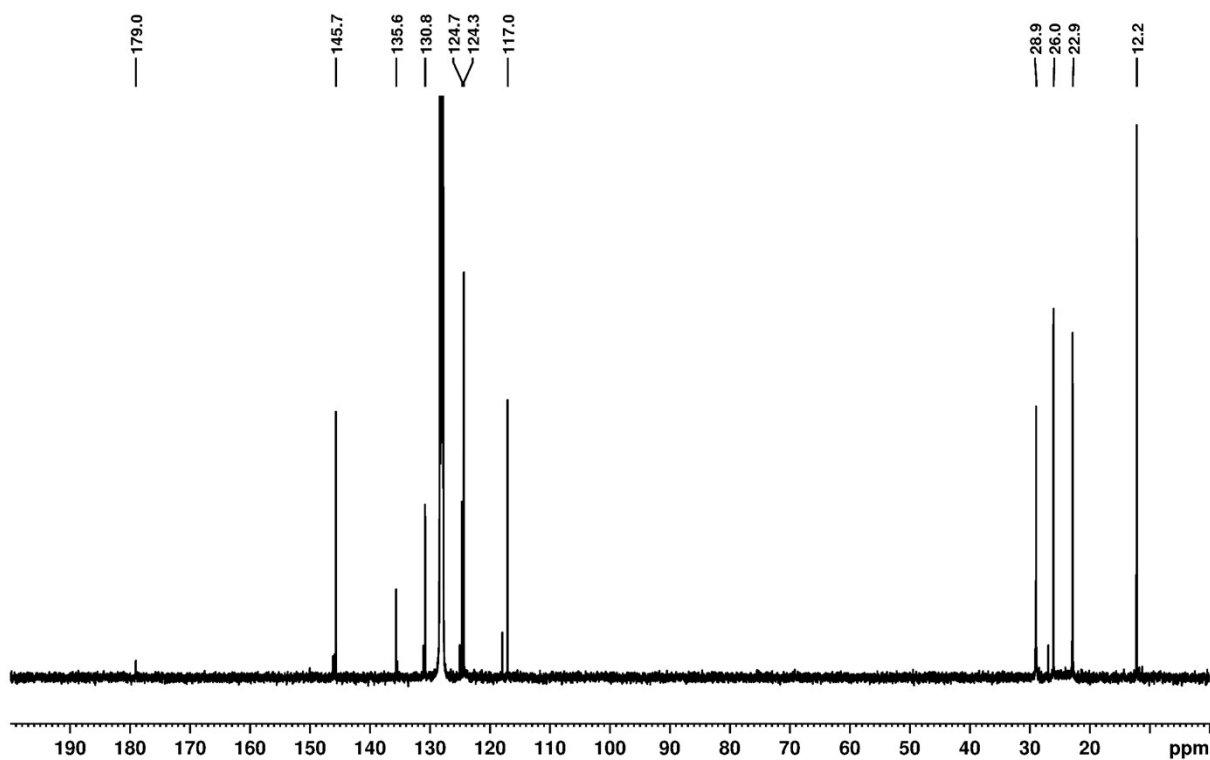

Figure S6. <sup>13</sup>C NMR spectrum (100.6 MHz, C<sub>6</sub>D<sub>6</sub>, 298 K) of (Dipp<sub>2</sub>Im)·Cp\*AlH<sub>2</sub> 7.

$(\text{Me}_2\text{Im}^{\text{Me}})\cdot\text{Cp}^*\text{GaH}_2$  **8**:

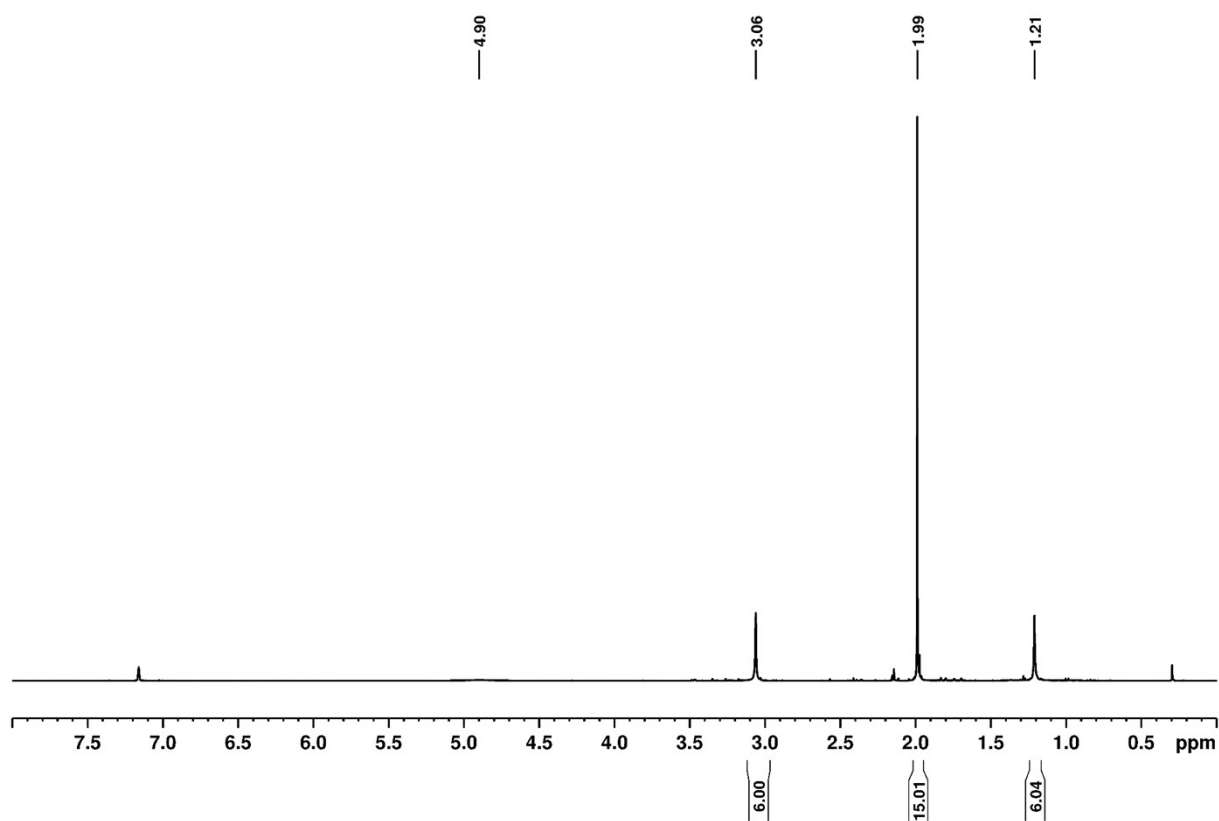

Figure S7.  $^1\text{H}$  NMR spectrum (400.1 MHz,  $\text{C}_6\text{D}_6$ , 298 K) of  $(\text{Me}_2\text{Im}^{\text{Me}})\cdot\text{Cp}^*\text{GaH}_2$  **8**.

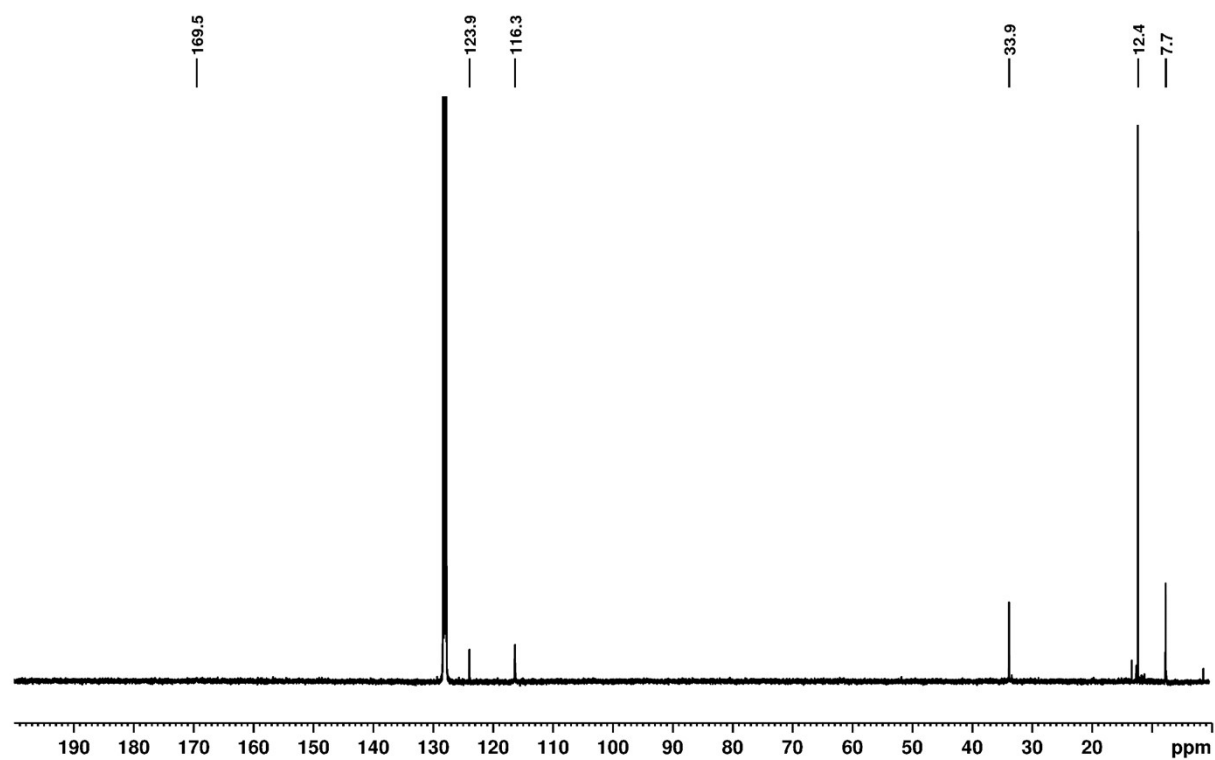

Figure S8.  $^{13}\text{C}$  NMR spectrum (100.6 MHz,  $\text{C}_6\text{D}_6$ , 298 K) of  $(\text{Me}_2\text{Im}^{\text{Me}})\cdot\text{Cp}^*\text{GaH}_2$  **8**.

$(i\text{Pr}_2\text{Im}^{\text{Me}})\cdot\text{Cp}^*\text{GaH}_2$  **9**:

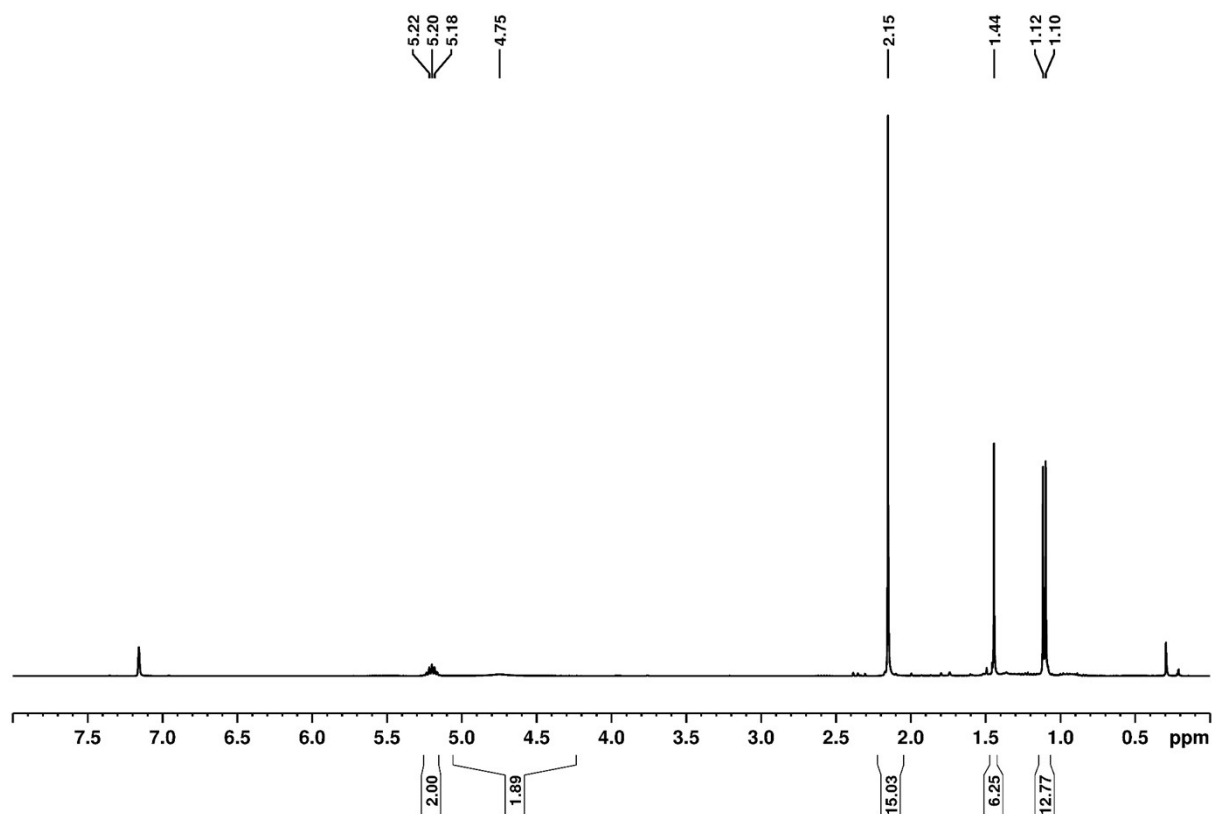

Figure S9.  $^1\text{H}$  NMR spectrum (400.1 MHz,  $\text{C}_6\text{D}_6$ , 298 K) of  $(i\text{Pr}_2\text{Im}^{\text{Me}})\cdot\text{Cp}^*\text{GaH}_2$  **9**.

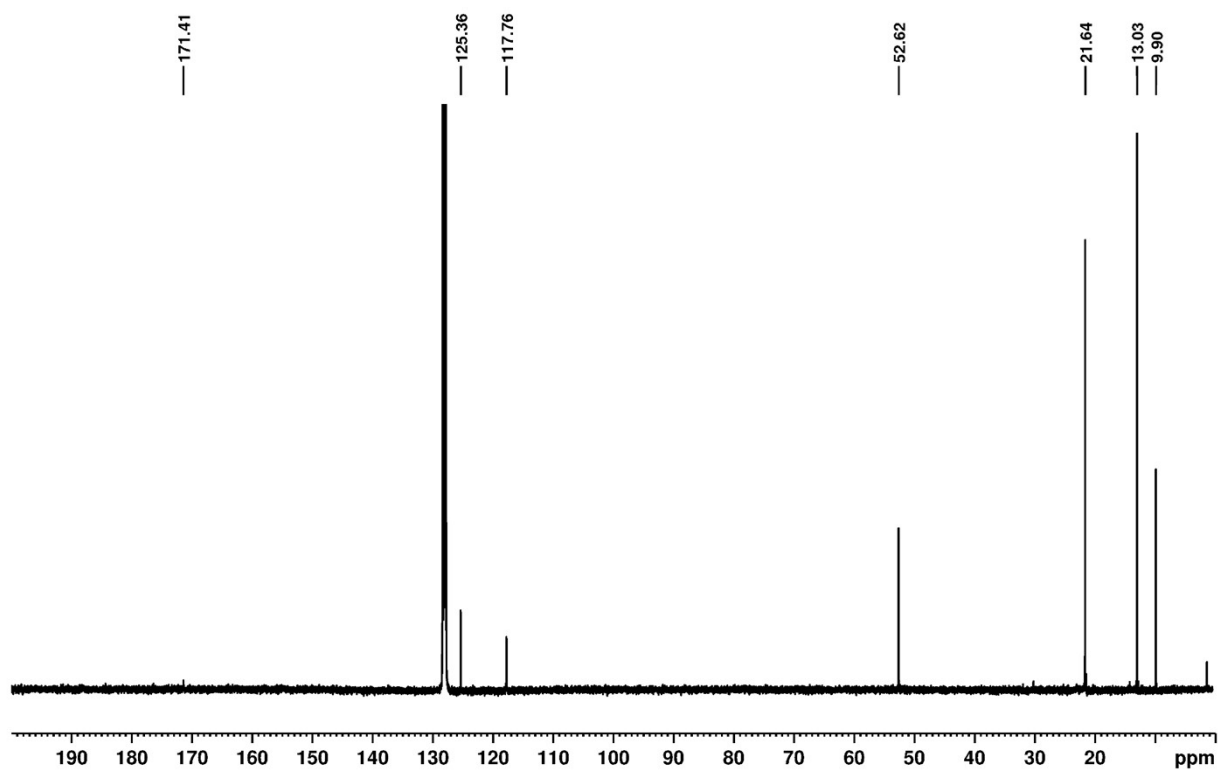

Figure S10.  $^{13}\text{C}$  NMR spectrum (100.6 MHz,  $\text{C}_6\text{D}_6$ , 298 K) of  $(i\text{Pr}_2\text{Im}^{\text{Me}})\cdot\text{Cp}^*\text{GaH}_2$  **9**.

(Dipp<sub>2</sub>Im)·Cp\*GaH<sub>2</sub> **10**:

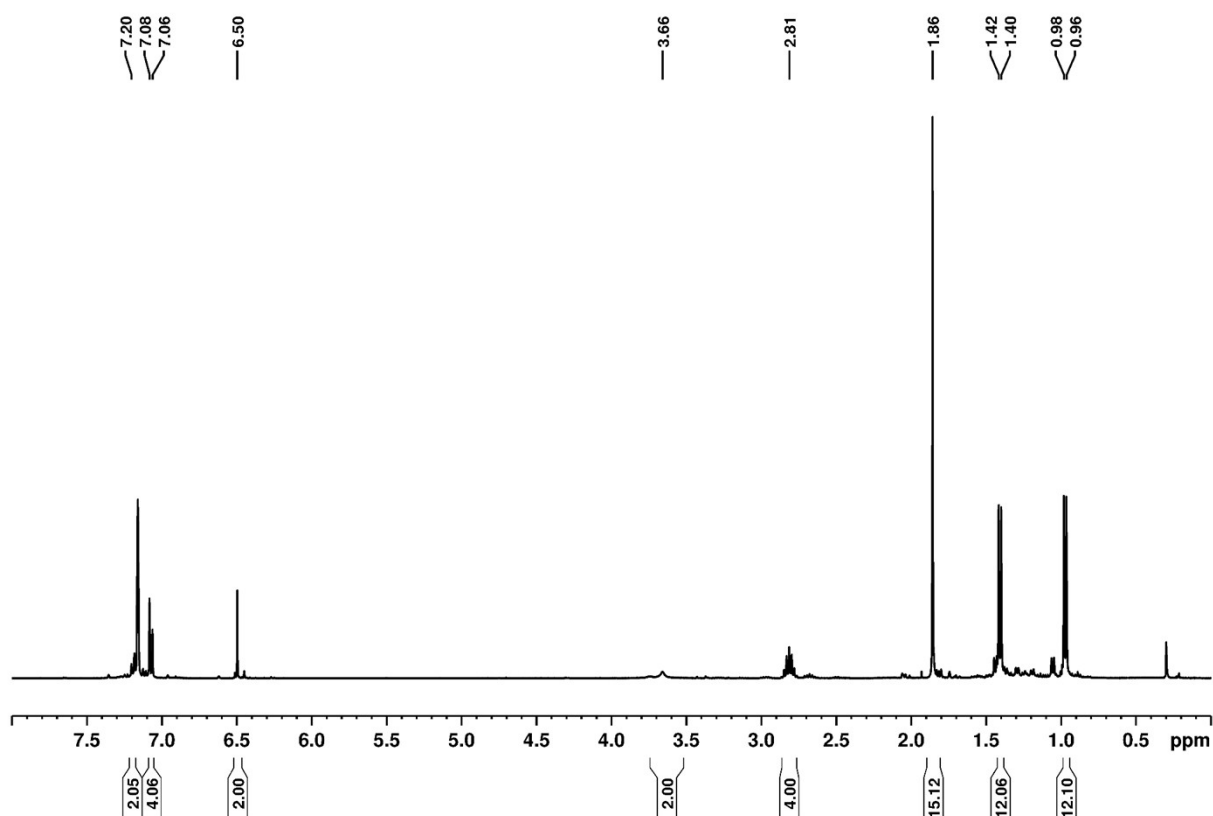

Figure S11. <sup>1</sup>H NMR spectrum (400.1 MHz, C<sub>6</sub>D<sub>6</sub>, 298 K) of (Dipp<sub>2</sub>Im)·Cp\*GaH<sub>2</sub> **10**.

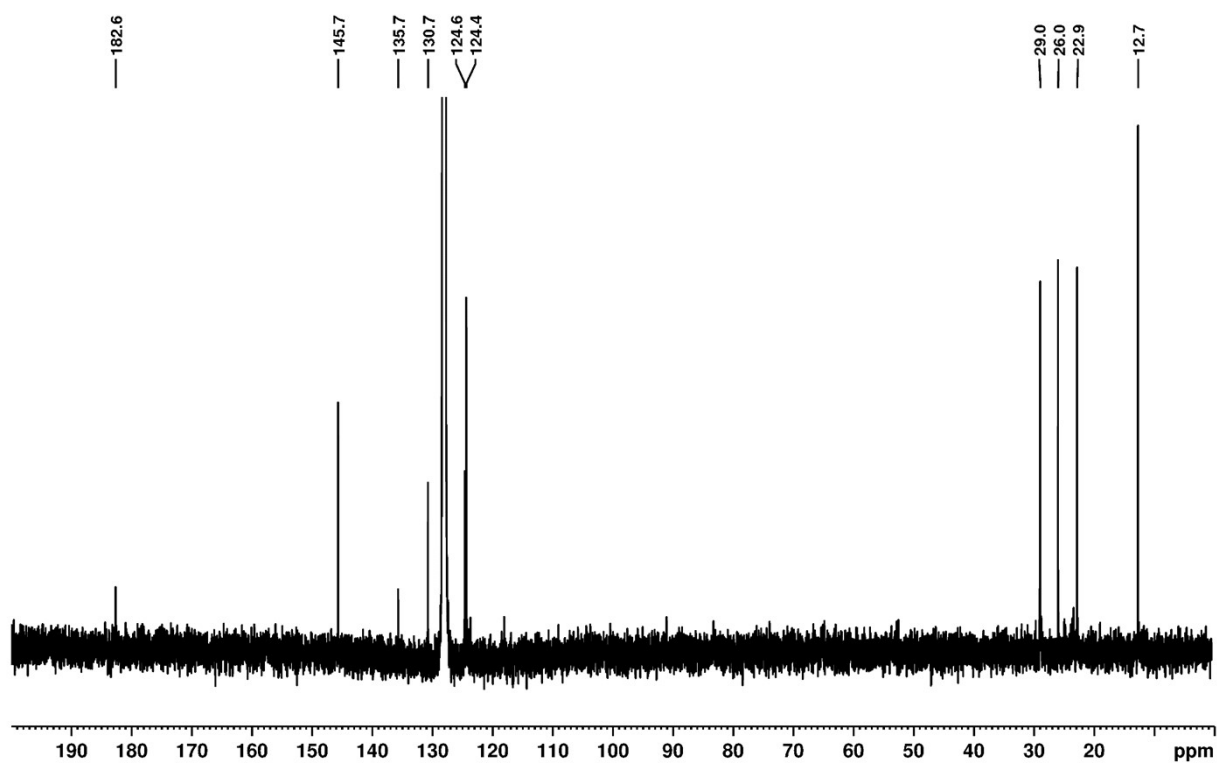

Figure S12. <sup>13</sup>C NMR spectrum (100.6 MHz, C<sub>6</sub>D<sub>6</sub>, 298 K) of (Dipp<sub>2</sub>Im)·Cp\*GaH<sub>2</sub> **10**.

(RER-Dipp<sub>2</sub>Im<sup>H</sup>H<sub>2</sub>)·AlCp\* **12**:

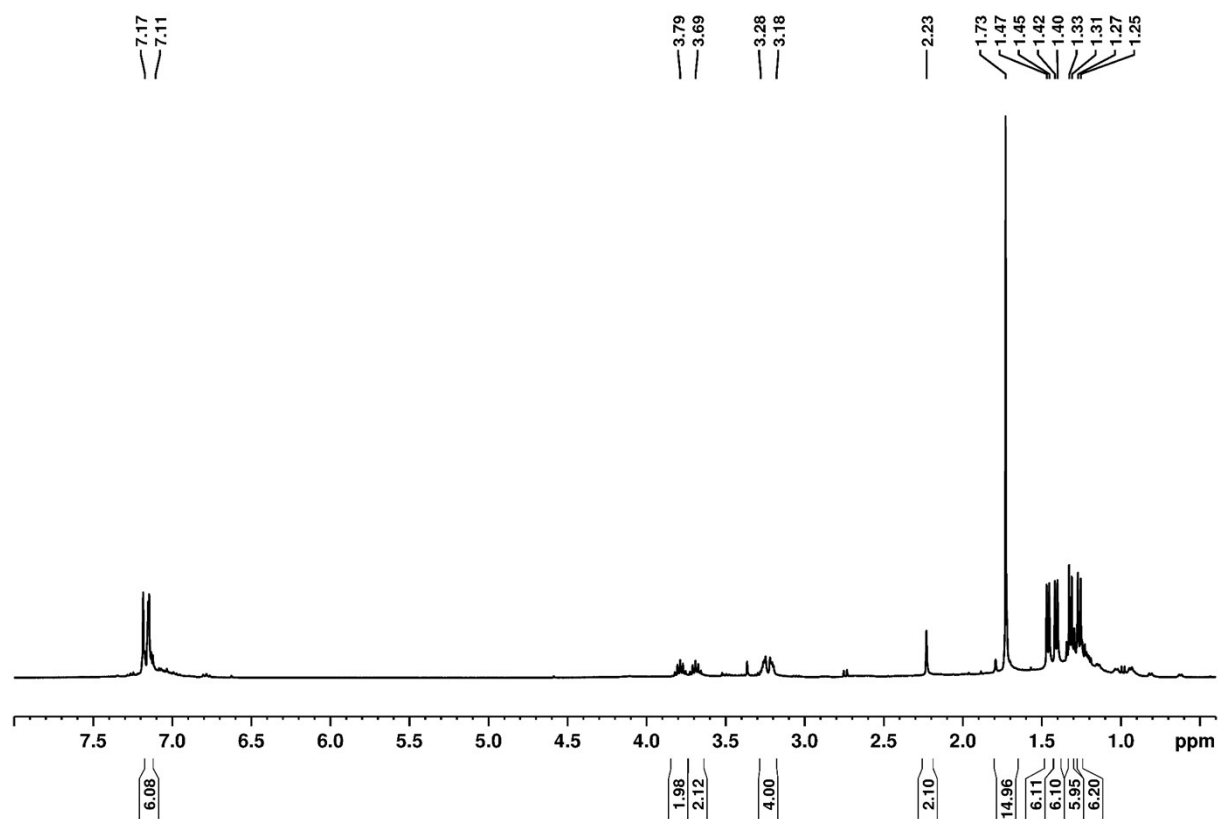

Figure S13. <sup>1</sup>H NMR spectrum (400.1 MHz, C<sub>6</sub>D<sub>6</sub>, 298 K) of (RER-Dipp<sub>2</sub>Im<sup>H</sup>H<sub>2</sub>)·AlCp\* **12**.

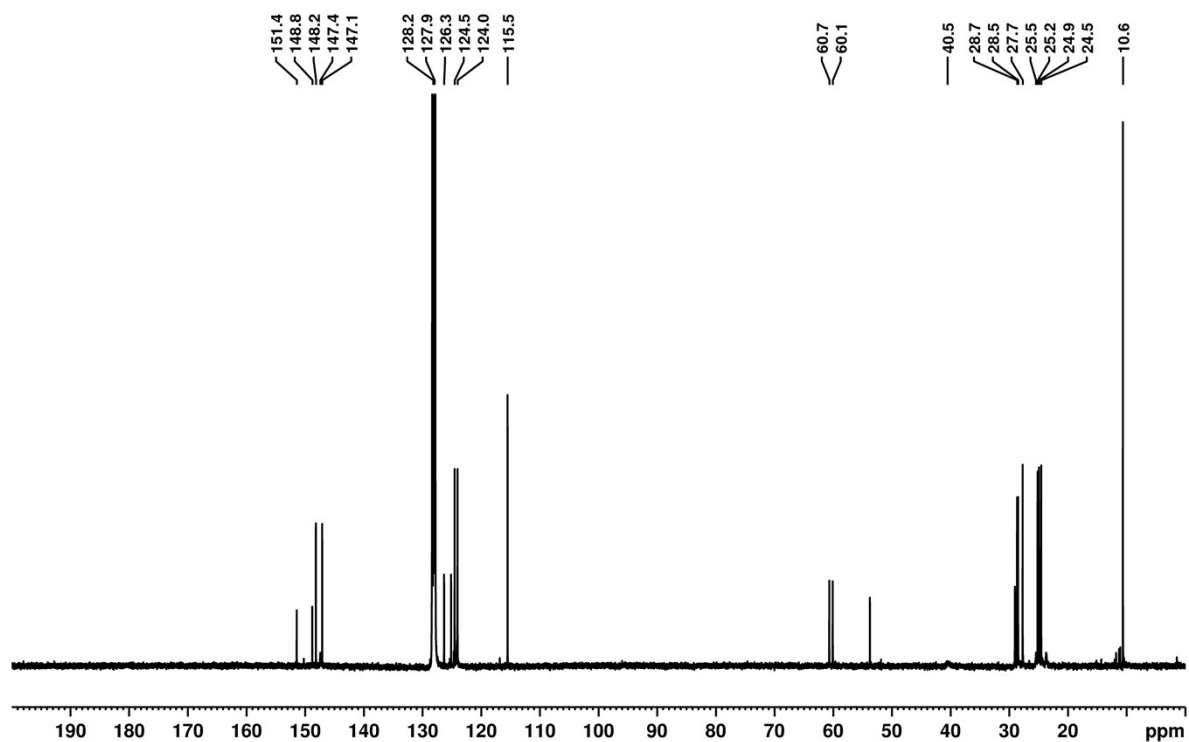

Figure S14: <sup>13</sup>C NMR spectrum (100.6 MHz, C<sub>6</sub>D<sub>6</sub>, 298 K) of (RER-Dipp<sub>2</sub>Im<sup>H</sup>H<sub>2</sub>)·AlCp\* **12**.



(Me<sub>2</sub>Im<sup>Me</sup>)<sub>2</sub>AlCp\*(RER-Dipp<sub>2</sub>Im<sup>H</sup>H<sub>2</sub>) **13**:

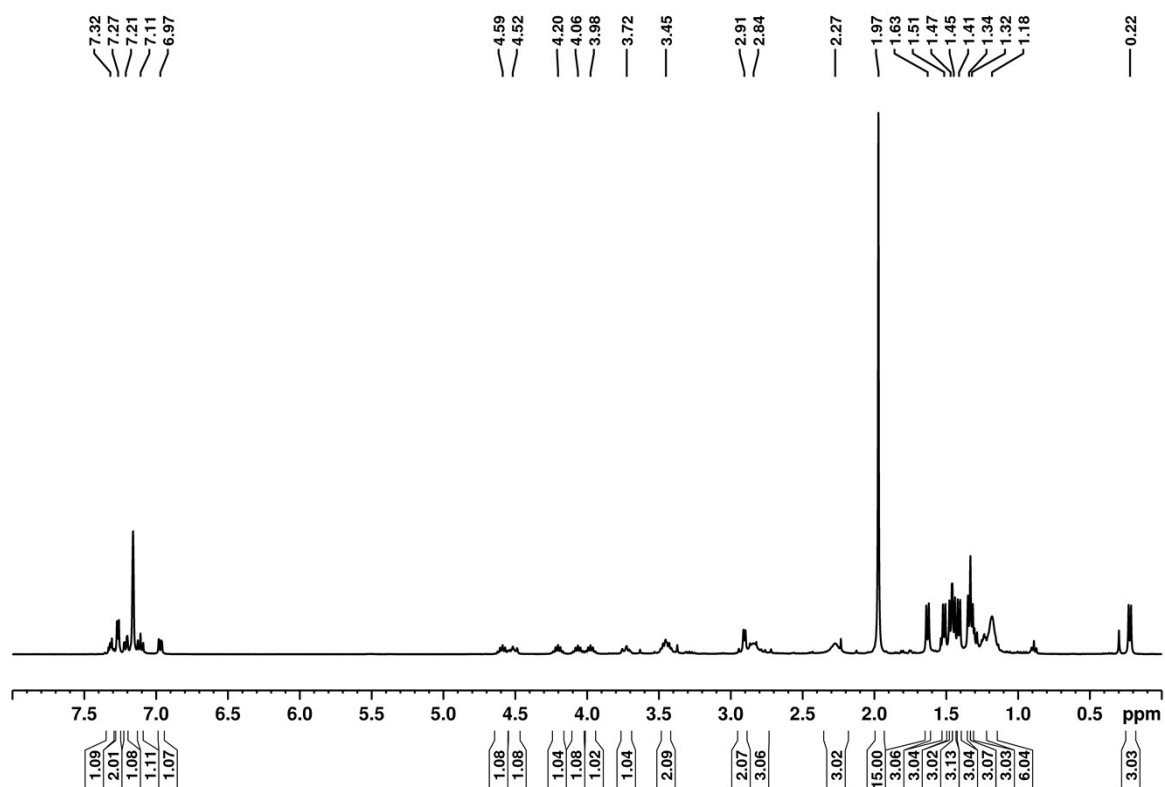

Figure S15. <sup>1</sup>H NMR spectrum (400.1 MHz, C<sub>6</sub>D<sub>6</sub>, 298 K) of (Me<sub>2</sub>Im<sup>Me</sup>)<sub>2</sub>AlCp\*(RER-Dipp<sub>2</sub>Im<sup>H</sup>H<sub>2</sub>) **13**.

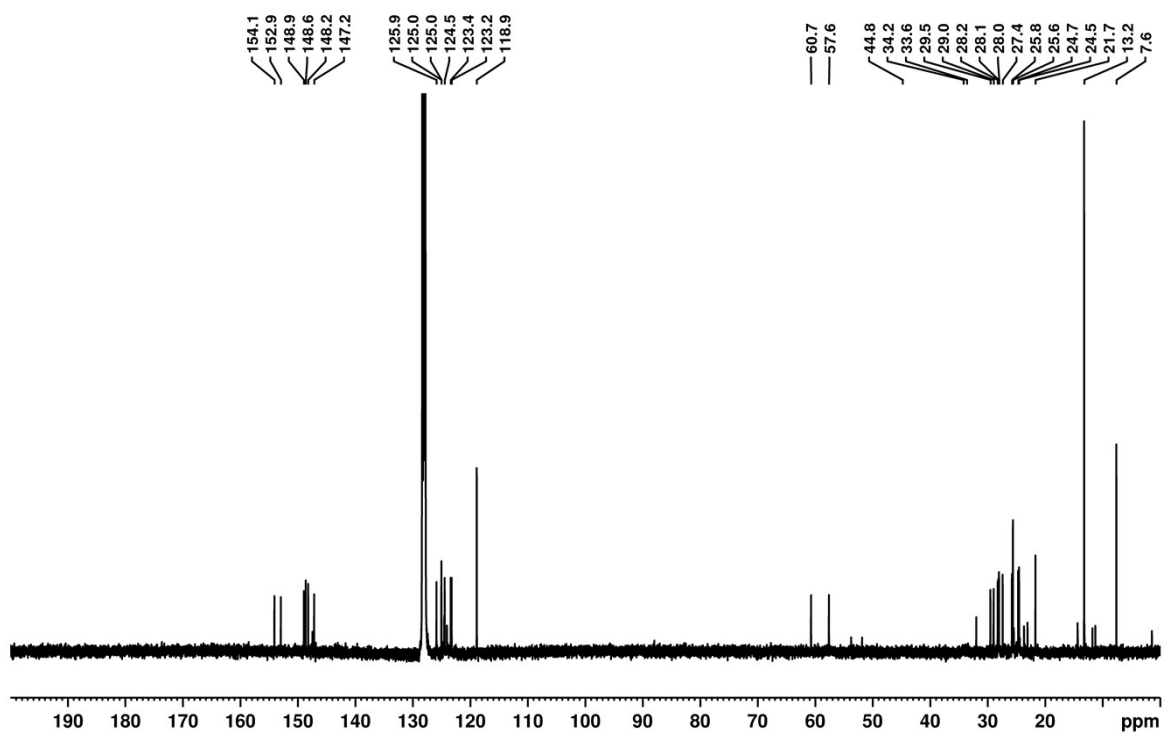

Figure S16. <sup>13</sup>C NMR spectrum (100.6 MHz, C<sub>6</sub>D<sub>6</sub>, 298 K) of (Me<sub>2</sub>Im<sup>Me</sup>)<sub>2</sub>AlCp\*(RER-Dipp<sub>2</sub>Im<sup>H</sup>H<sub>2</sub>) **13**.

*rac*-(Me<sub>2</sub>Im<sup>Me</sup>)-AlHCp\*(cAAC<sup>Me</sup>H) *rac*-14:

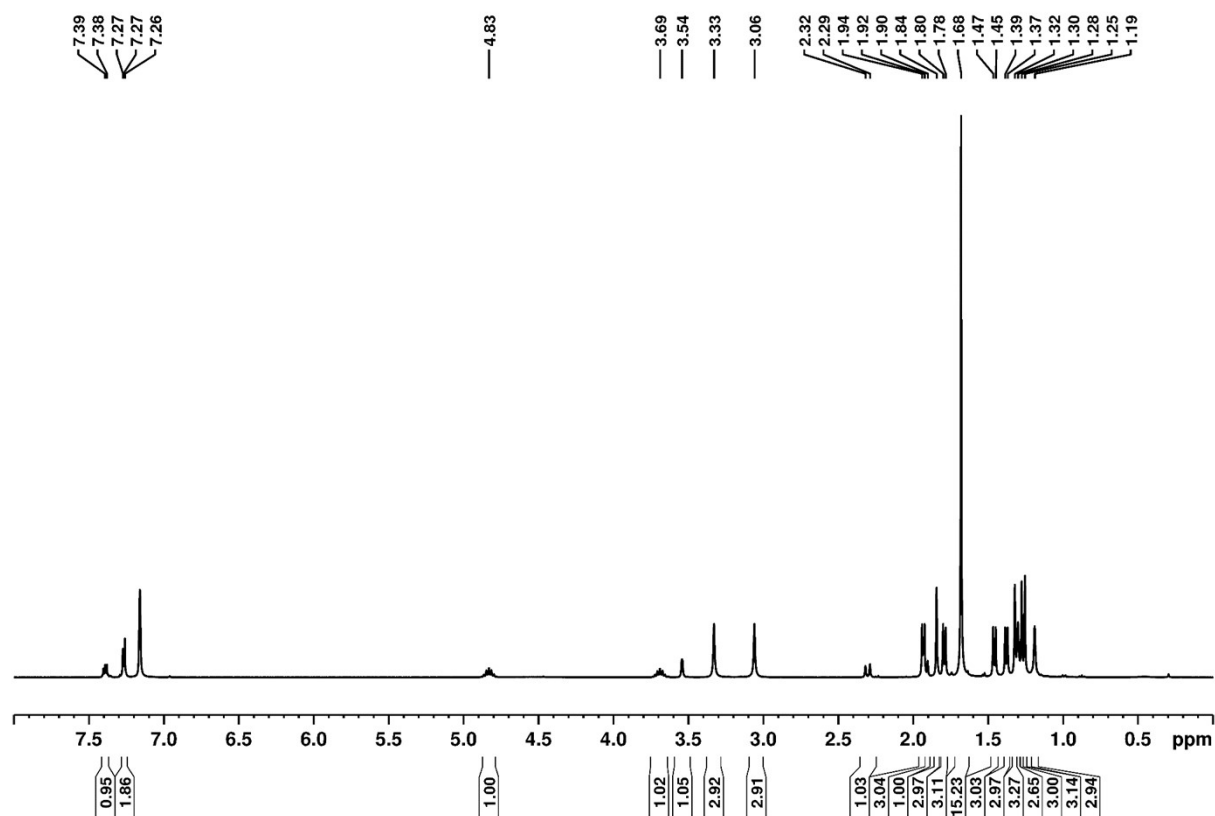

Figure S17. <sup>1</sup>H NMR spectrum (400.1 MHz, C<sub>6</sub>D<sub>6</sub>, 298 K) of *rac*-(Me<sub>2</sub>Im<sup>Me</sup>)-AlHCp\*(cAAC<sup>Me</sup>H) *rac*-14.

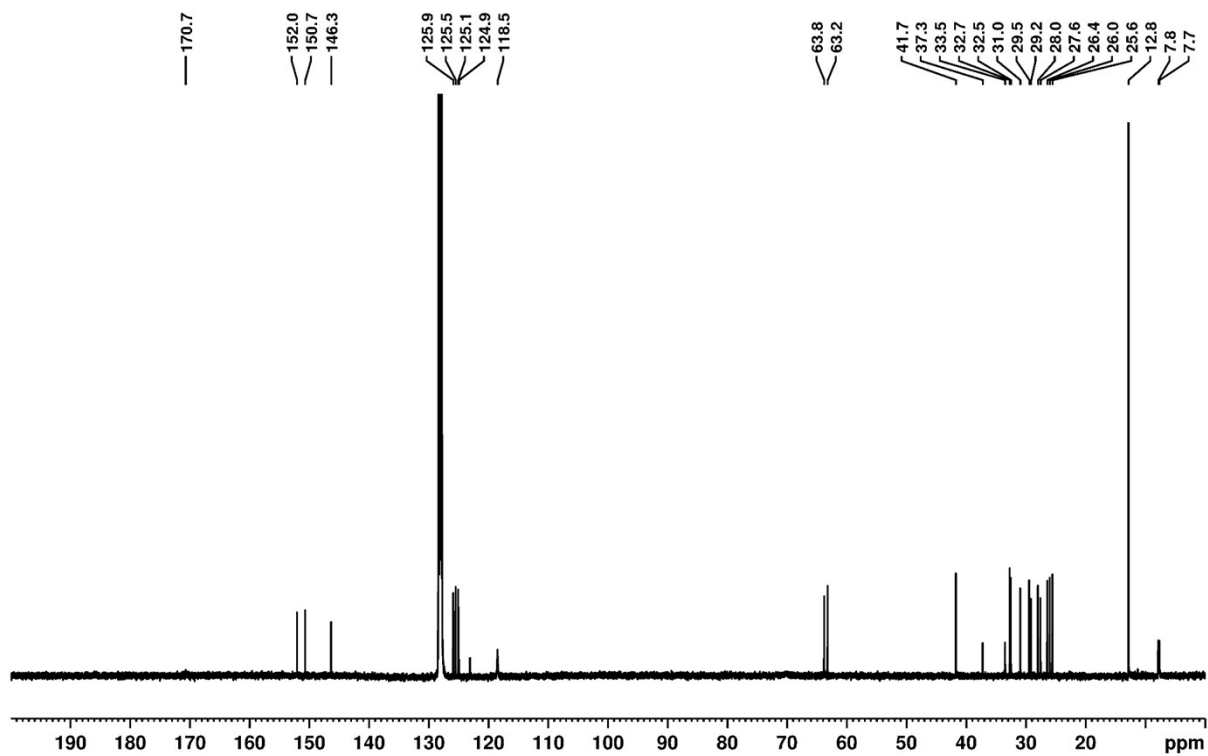

Figure S18. <sup>13</sup>C NMR spectrum (100.6 MHz, C<sub>6</sub>D<sub>6</sub>, 298 K) of *rac*-(Me<sub>2</sub>Im<sup>Me</sup>)-AlHCp\*(cAAC<sup>Me</sup>H) *rac*-14.

*meso*-(Me<sub>2</sub>Im<sup>Me</sup>)·AlHCp\*(cAAC<sup>Me</sup>H) **meso-14**:

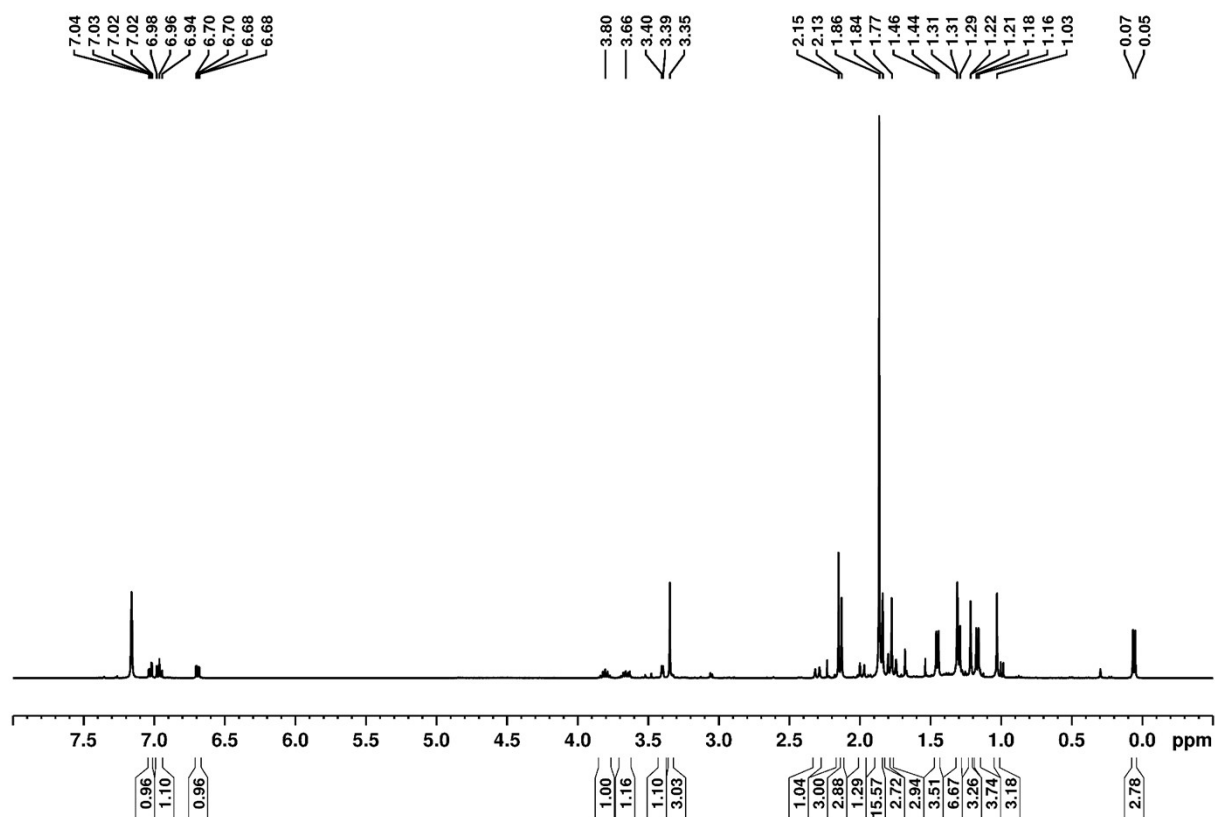

Figure S19. <sup>1</sup>H NMR spectrum (400.1 MHz, C<sub>6</sub>D<sub>6</sub>, 298 K) of *meso*-(Me<sub>2</sub>Im<sup>Me</sup>)·AlHCp\*(cAAC<sup>Me</sup>H) **meso-14**.

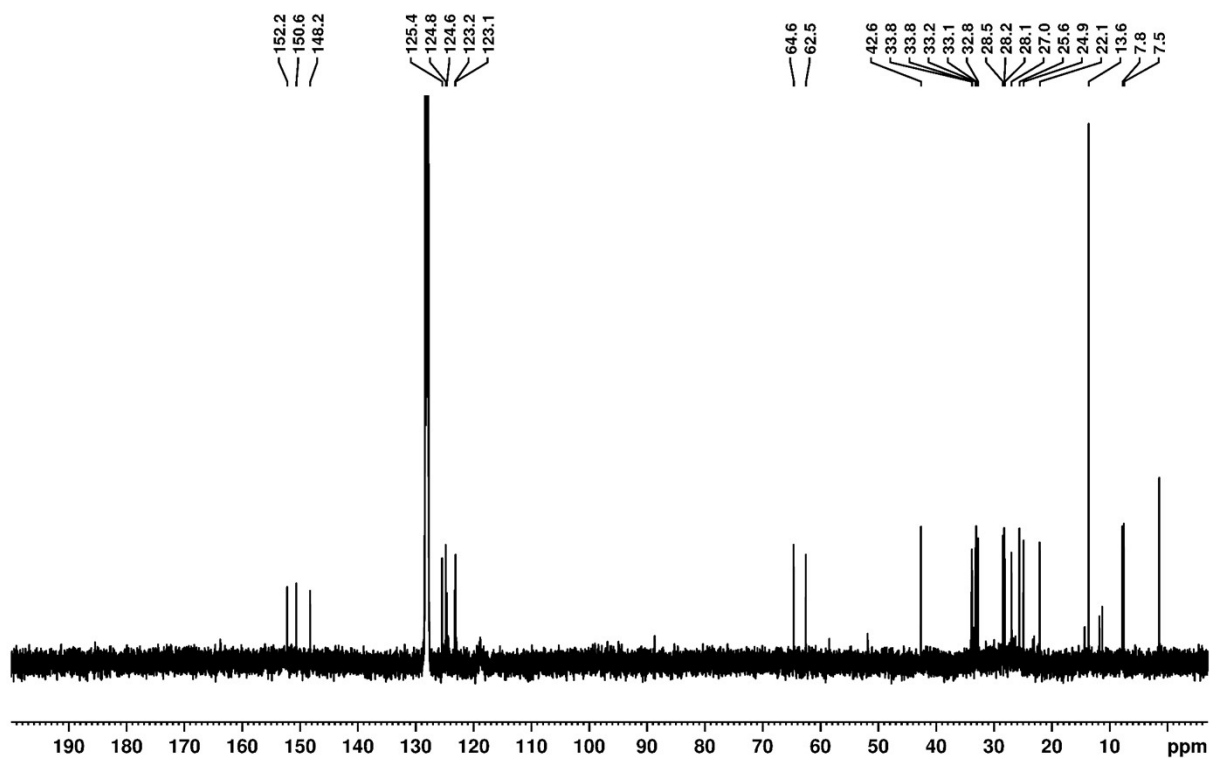

Figure S20. <sup>13</sup>C NMR spectrum (100.6 MHz, C<sub>6</sub>D<sub>6</sub>, 298 K) of *meso*-(Me<sub>2</sub>Im<sup>Me</sup>)·AlHCp\*(cAAC<sup>Me</sup>H) **meso-14**.

(cAAC<sup>Me</sup>H)AlHCp\* **15**:

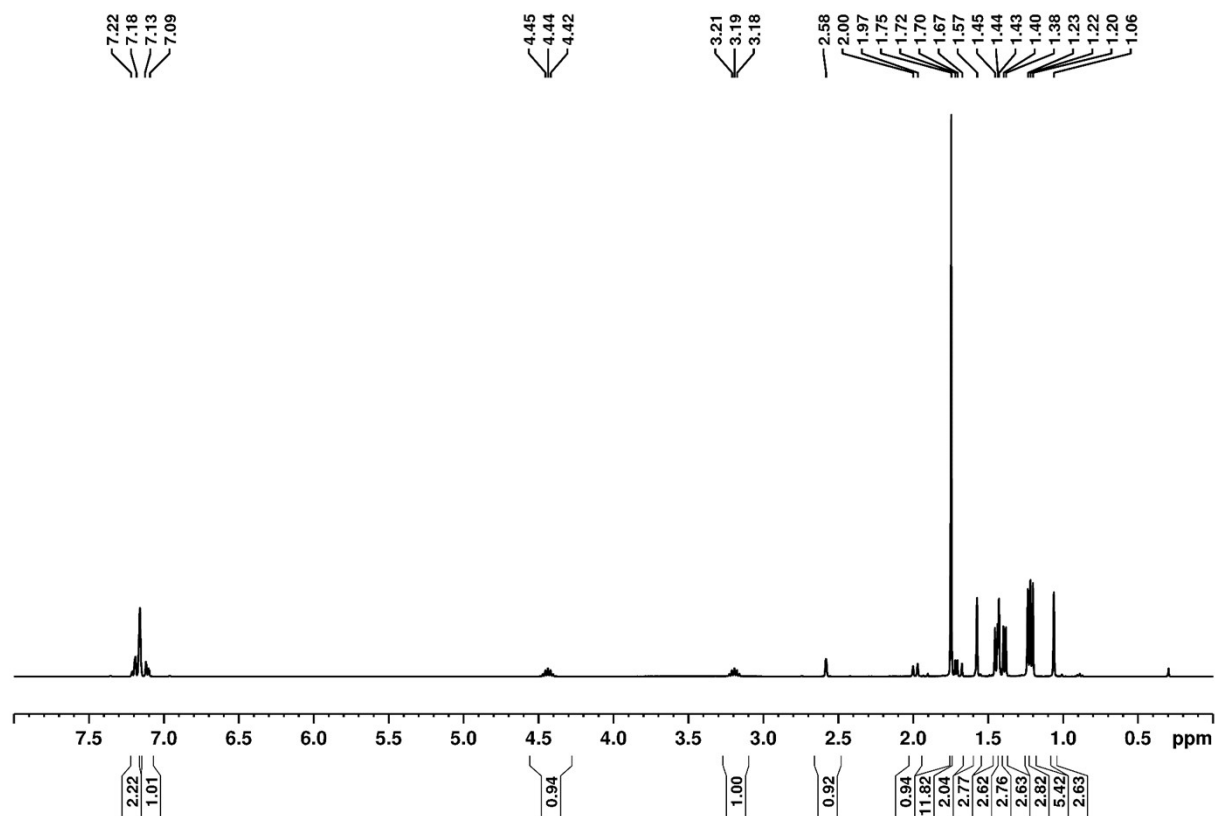

Figure S21. <sup>1</sup>H NMR spectrum (400.1 MHz, C<sub>6</sub>D<sub>6</sub>, 298 K) of (cAAC<sup>Me</sup>H)AlHCp\* **15**.

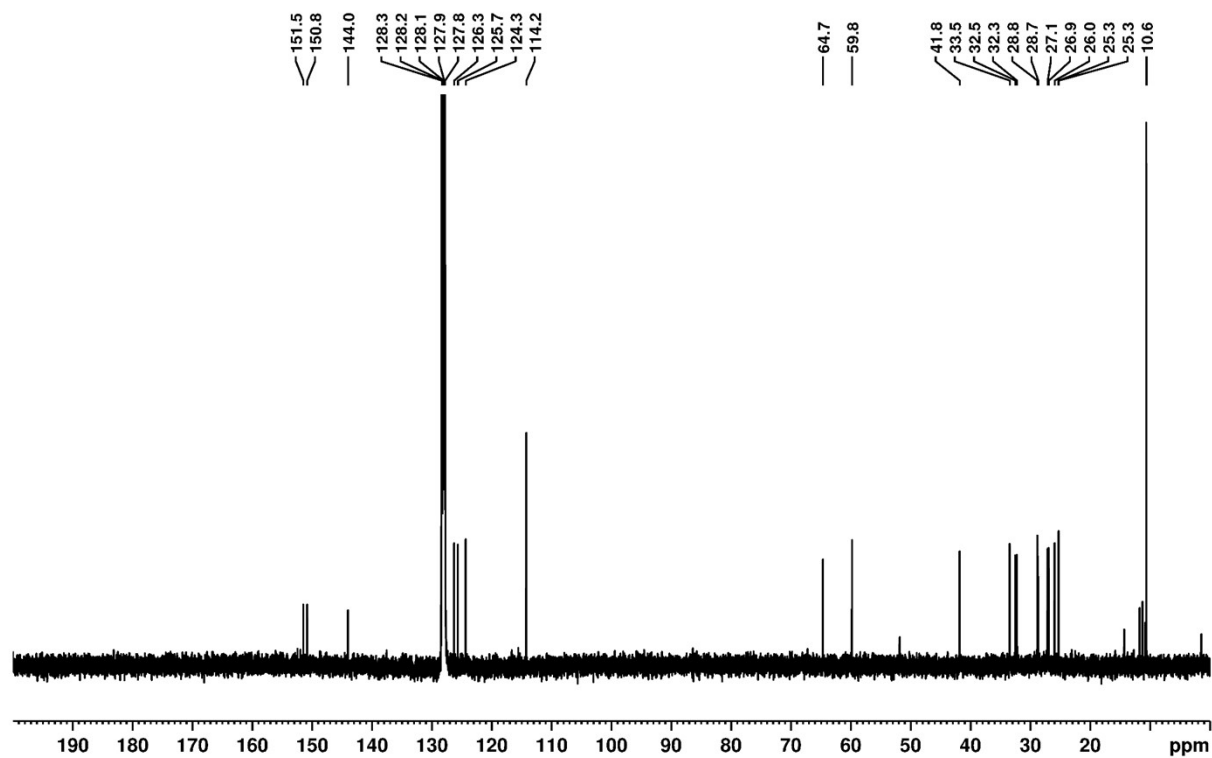

Figure S22. <sup>13</sup>C NMR spectrum (100.6 MHz, C<sub>6</sub>D<sub>6</sub>, 298 K) of (cAAC<sup>Me</sup>H)AlHCp\* **15**.

Reaction of  $(\text{Dipp}_2\text{Im})\cdot\text{Cp}^*\text{GaH}_2$  **10** with  $\text{cAAC}^{\text{Me}}$ :

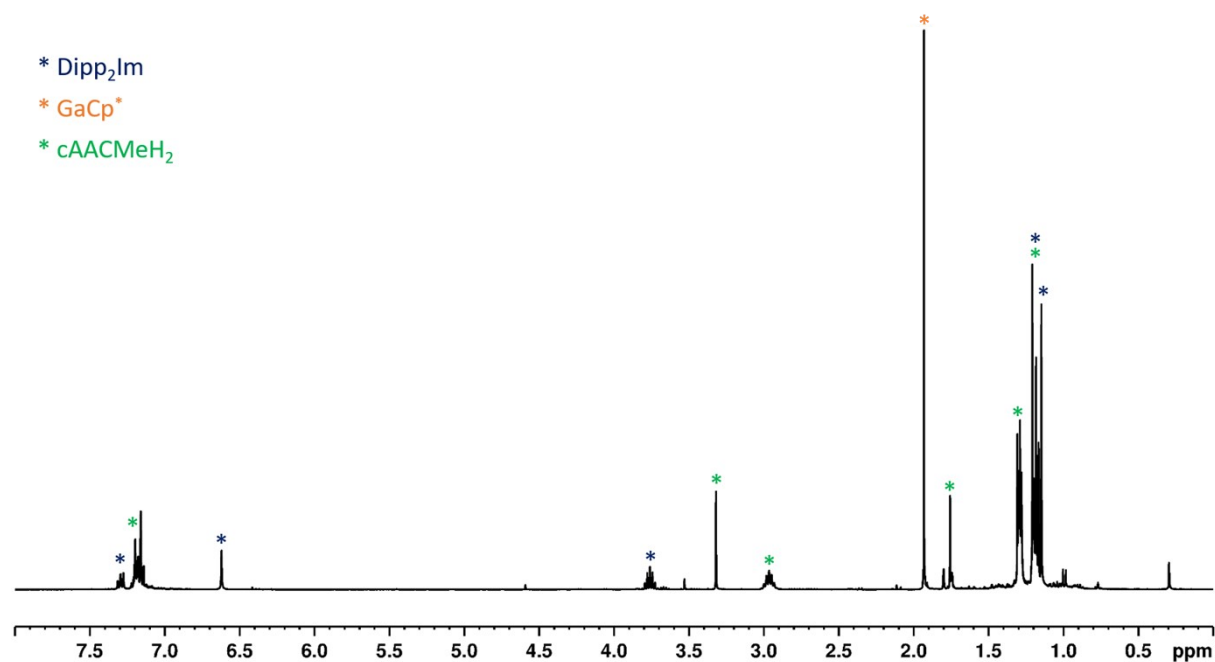

Figure S23.  $^1\text{H}$  NMR spectrum (400.1 MHz,  $\text{C}_6\text{D}_6$ , 298 K) of the reaction mixture of  $(\text{Dipp}_2\text{Im})\cdot\text{Cp}^*\text{GaH}_2$  **10** with  $\text{cAAC}^{\text{Me}}$  after 4 hours at  $60^\circ\text{C}$ . Signals marked with the blue asterisk belong to free  $\text{Dipp}_2\text{Im}$ , the signal with the orange asterisk to  $\text{GaCp}^*$  and the signals with the green asterisk to  $\text{cAAC}^{\text{MeH}_2}$ .

$\text{GaCp}^*$  **16**:

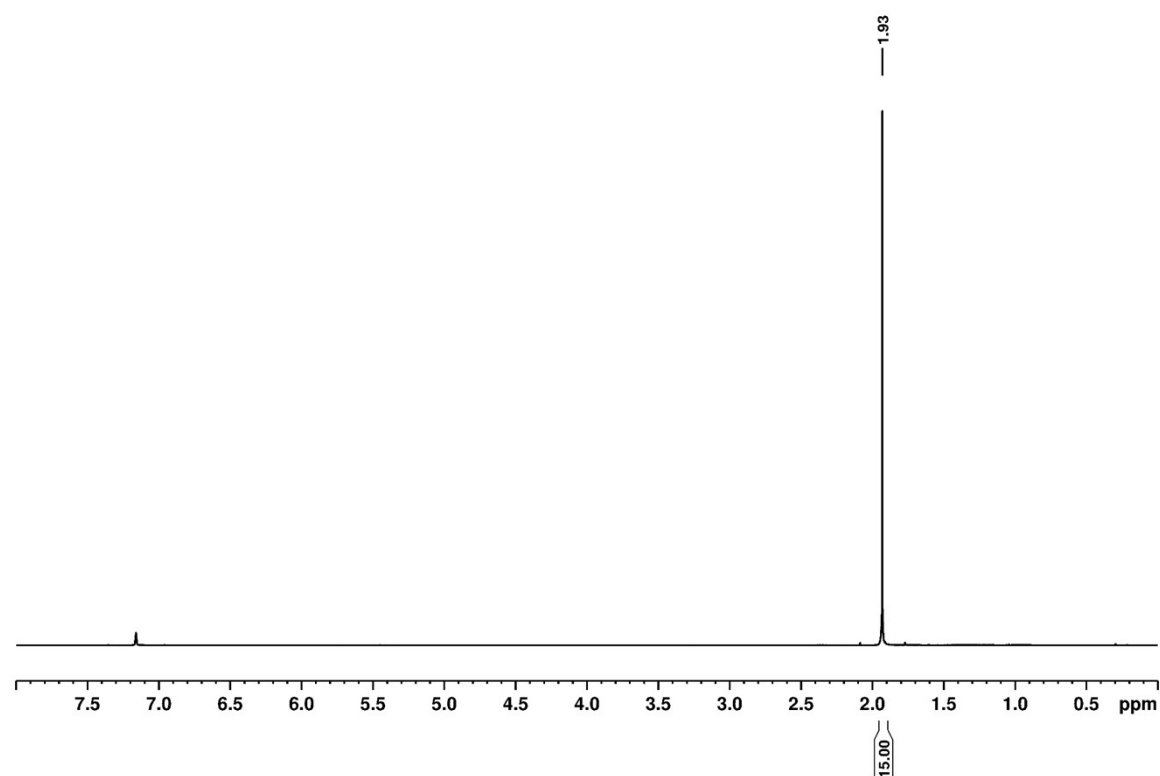

Figure S24.  $^1\text{H}$  NMR spectrum (400.1 MHz,  $\text{C}_6\text{D}_6$ , 298 K) of  $\text{GaCp}^*$  **16**.

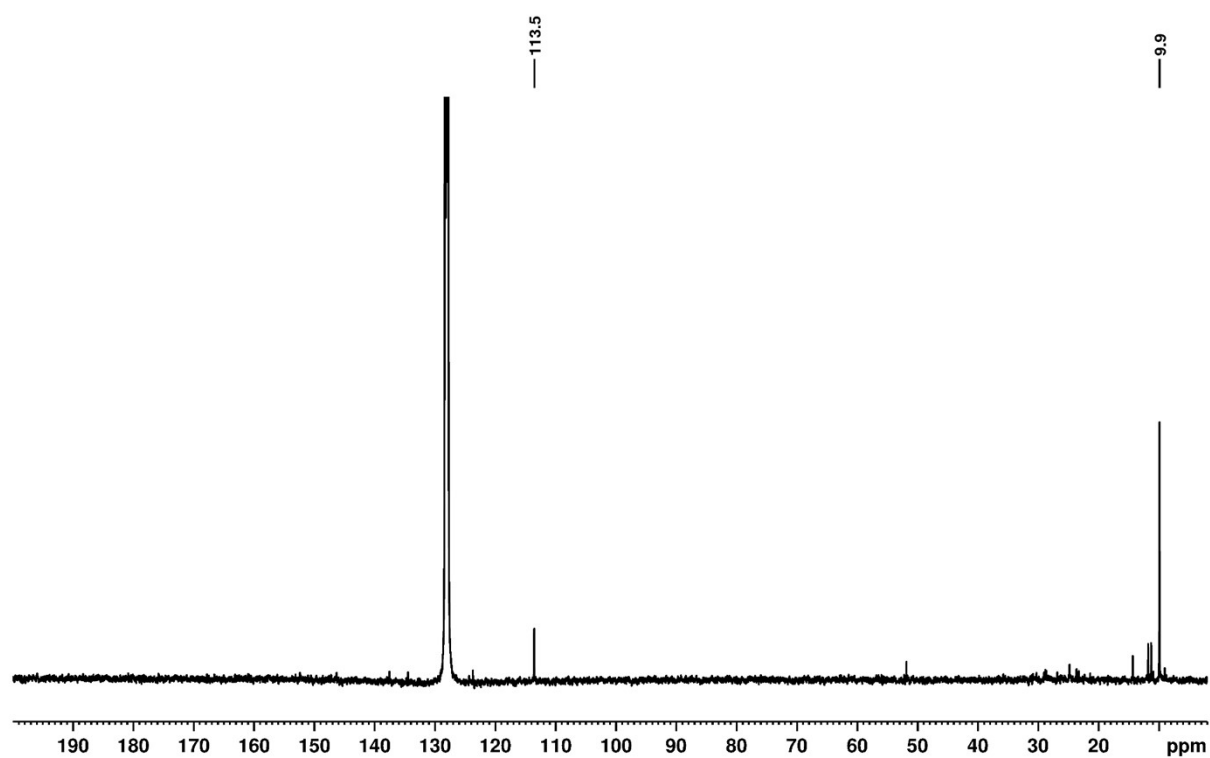

Figure S25.  $^{13}\text{C}$  NMR spectrum (100.6 MHz,  $\text{C}_6\text{D}_6$ , 298 K) of  $\text{GaCp}^*$  **16**.
